# Supplementary material for: Comparison of Antibacterial and Immunological Properties of Mesenchymal Stem/Stromal Cells from Equine Bone Marrow, Endometrium, and Adipose Tissue
Source: PubMed Central journal article supplement (PMC6209426; doi:10.1089/scd.2017.0241), 2018-10-31
Supplement: Supp_Fig1.pdf [file Supp_Fig1.pdf]

## Supplementary Data

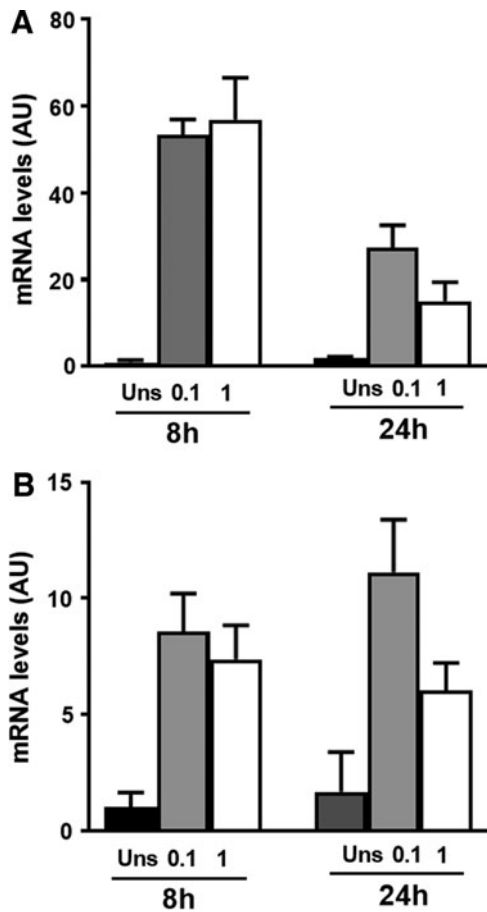

**SUPPLEMENTARY FIG. S1.** IL-6 mRNA levels from BM-MSCs (A) and AT-MSCs (B) that were unstimulated (Uns) or stimulated with 0.1 or 1  $\mu\text{g}/\text{mL}$  LPS for 8 or 24 h. Results (mean  $\pm$  SEM) are from one cell preparation of each type assayed in triplicate. AT, adipose tissue; AU, arbitrary units; BM, bone marrow; IL-6, interleukin-6; LPS, lipopolysaccharide; mRNA, messenger RNA; MSCs, mesenchymal stem/stromal cells; SEM, standard error of the mean.
